# Supplementary material
Source: PubMed Central journal article supplement (PMC7526826)
Supplement: AAC.00246-20-s0001.pdf [file AAC.00246-20-s0001.pdf]

1 **Polymyxin triple combinations against polymyxin-resistant, multidrug-resistant**

2 **KPC-producing *Klebsiella pneumoniae***

3  
4 Su Mon Aye<sup>1</sup>, Irene Galani<sup>2</sup>, Heidi Yu<sup>1</sup>, Jiping Wang<sup>1</sup>, Ke Chen<sup>1</sup>, Hasini Wickremasinghe<sup>1</sup>,  
5 Ilias Karaiskos<sup>3</sup>, Phillip J. Bergen<sup>1</sup>, Jinxin Zhao<sup>1</sup>, Tony Velkov<sup>4</sup>, Helen Giamarellou<sup>3</sup>,  
6 Yu-Wei Lin<sup>1</sup>, Brian Tsuji<sup>5</sup>, Jian Li<sup>1\*</sup>

7  
8 <sup>1</sup>Monash Biomedicine Discovery Institute, Department of Microbiology, Monash University,  
9 Clayton, Victoria 3800, Australia;

10 <sup>2</sup>Fourth Department of Internal Medicine, National and Kapodistrian University of Athens,  
11 Athens, Greece;

12 <sup>3</sup>First Department of Internal Medicine-Infectious Diseases, Hygeia General Hospital, Athens,  
13 Greece;

14 <sup>4</sup>Department of Pharmacology & Therapeutics, School of Biomedical Sciences, Faculty of  
15 Medicine, Dentistry and Health Sciences, The University of Melbourne, Parkville, VIC, 3010,  
16 Australia;

17 <sup>5</sup>Laboratory for Antimicrobial Pharmacodynamics, NYS Centre of Excellence in  
18 Bioinformatics & Life Sciences, Buffalo, NY, USA.

19  
20 Email addresses: SMA, su.aye@monash.edu; IG, egalani@med.uoa.gr; HY,  
21 heidi.yu@monash.edu; JP, jiping.wang@monash.edu; KC, ke.chen@monash.edu; HW,  
22 hasini.wickremasinghe@monash.edu; IK, ikaraiskos@hygeia.gr; PJB,

23 phillip.bergen@monash.edu; JZ, Jinxin.Zhao@monash.edu; TV,  
24 tony.velkov@unimelb.edu.au; EG, e.giamarellou@hygeia.gr; YWL, yu-wei.lin@monash.edu;  
25 BT, btsuji@buffalo.edu; JL, jian.li@monash.edu.

26

27 \*Corresponding author. Prof Jian Li. 19 Innovation Walk, Monash University, VIC 3800,  
28 Australia. Tel: +61 3 9903 9702, Fax: +61 3 9905 6450, Email: [jian.li@monash.edu](mailto:jian.li@monash.edu).

29

## Supplementary data

**TABLE S1.** Log changes in viable cell counts at 1, 5, 12, 13, 24, 25, 36, 37, and 48h with clinically relevant concentrations of polymyxin B, rifampicin and amikacin as monotherapy and double- and triple-combination therapies against two polymyxin-resistant, MDR *K. pneumoniae* isolates using one-compartment *in vitro* model<sup>a</sup>.

| Isolate | Time (h) | Log change [ $\log_{10}(\text{CFU}_t) - \log_{10}(\text{CFU}_0)$ ] |       |       |       |           |           |           |                |
|---------|----------|--------------------------------------------------------------------|-------|-------|-------|-----------|-----------|-----------|----------------|
|         |          | Control                                                            | PMB   | RIF   | AMI   | PMB + RIF | PMB + AMI | RIF + AMI | PMB + RIF+ AMI |
| ATH 16  | 1        | 0.02                                                               | -0.09 | -0.88 | -0.75 | -2.73     | -0.17     | -0.11     | -3.59          |
|         | 5        | 1.74                                                               | 1.74  | 1.62  | 1.65  | -4.93     | -2.57     | 1.27      | -6.59          |
|         | 12       | 1.82                                                               | 1.97  | 1.95  | 1.84  | -4.93     | -2.48     | 1.67      | -6.59          |
|         | 13       | 1.86                                                               | 1.73  | 1.89  | 1.64  | -4.93     | -2.54     | 2.28      | -6.59          |
|         | 24       | 1.78                                                               | 1.77  | 1.76  | 1.43  | -4.23     | 1.85      | 1.69      | -6.59          |
|         | 25       | 1.67                                                               | 1.78  | 1.68  | 1.60  | -2.42     | 2.03      | 1.79      | -6.59          |
|         | 36       | 1.80                                                               | 1.72  | 1.76  | 1.45  | -2.93     | 1.77      | 1.87      | -4.34          |
|         | 37       | 1.58                                                               | 1.75  | 1.81  | 1.10  | -2.76     | 1.12      | 1.68      | -4.99          |
|         | 48       | 1.52                                                               | 1.52  | 1.65  | 1.49  | -1.61     | 1.74      | 1.37      | -4.45          |
| BD 32   | 1        | 0.43                                                               | 0.43  | 0.39  | 0.40  | -0.80     | 0.04      | -0.79     | -1.37          |
|         | 5        | 1.68                                                               | 1.61  | 1.77  | 1.33  | -3.24     | -0.32     | 1.12      | -3.00          |
|         | 12       | 1.84                                                               | 1.90  | 1.69  | 1.61  | -2.27     | 1.70      | 1.45      | -3.32          |
|         | 13       | 1.77                                                               | 1.59  | 1.74  | 1.51  | -2.99     | 1.64      | 1.36      | -3.59          |
|         | 24       | 1.49                                                               | 1.82  | 1.39  | 1.26  | -2.58     | 1.64      | 1.22      | -3.60          |
|         | 25       | 1.70                                                               | 1.79  | 1.70  | 1.41  | -2.41     | 1.75      | 1.44      | -3.26          |
|         | 36       | 1.68                                                               | 2.02  | 1.67  | 1.14  | -1.48     | 1.63      | 1.76      | -5.17          |
|         | 37       | 1.45                                                               | 1.42  | 1.93  | 1.56  | -2.21     | 1.50      | 1.68      | -4.95          |
|         | 48       | 1.44                                                               | 1.72  | 1.42  | 1.19  | -0.49     | 1.40      | 1.23      | -5.35          |

<sup>a</sup>PMB, polymyxin B (constant concentration of 2 µg/mL); RIF, rifampicin ( $C_{\max}$ , 5 µg/mL;  $t_{1/2}$ , 2.5h); AMI, amikacin ( $C_{\max}$ , 20 µg/mL;  $t_{1/2}$ , 2.5h).

A red background indicates additive against monotherapy; a green background indicates synergistic against monotherapy; black numbers (underlined> in green background indicate synergistic against monotherapy and additive against double combination therapy; red numbers in green background indicate synergistic against both monotherapy and double-combination therapy.

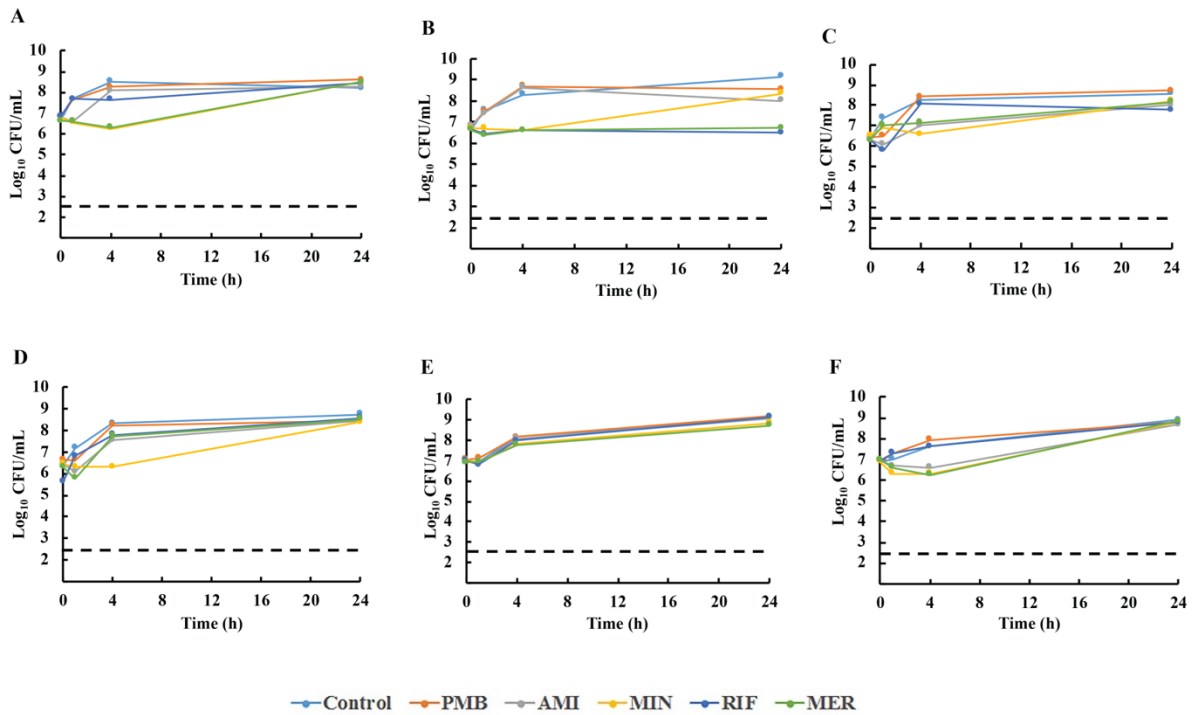

**FIG S1.** Static time-kill curves with clinically relevant concentrations of polymyxin B (PMB, 2  $\mu\text{g}/\text{mL}$ ), amikacin (AMI, 20  $\mu\text{g}/\text{mL}$ ), minocycline (MIN, 4  $\mu\text{g}/\text{mL}$ ), rifampicin (RIF, 5  $\mu\text{g}/\text{mL}$ ) and meropenem (MER, 50  $\mu\text{g}/\text{mL}$ ) as monotherapy with an inoculum of  $\sim 10^7$  CFU/mL. (A) ATH 8; (B) ATH 16; (C) ATH 18; (D) ATH 24; (E) BD 32; and (F) BD 46. The y-axis starts from the limit of detection ( $\sim 1.3\text{-log}_{10}$  CFU/mL) and the dashed horizontal line represents the limit of quantification.

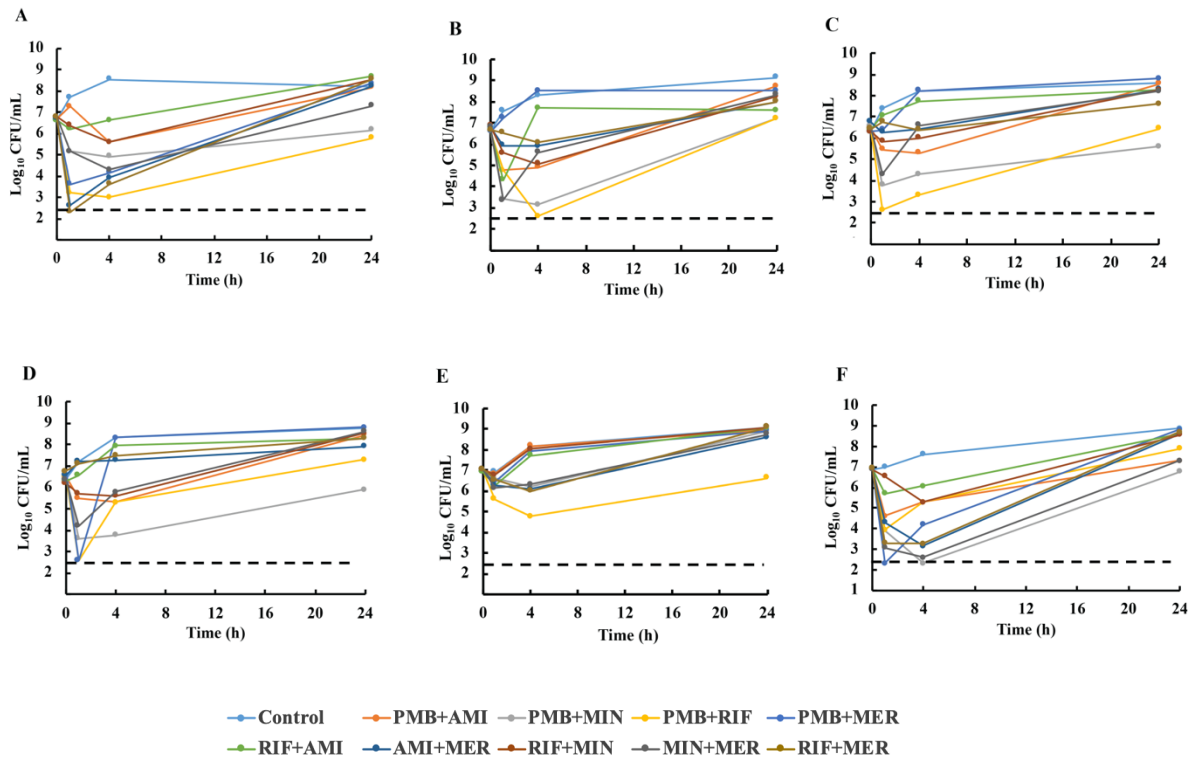

**FIG S2.** Static time-kill curves with clinically relevant concentrations of polymyxin B (PMB, 2  $\mu\text{g}/\text{mL}$ ), amikacin (AMI, 20  $\mu\text{g}/\text{mL}$ ), minocycline (MIN, 4  $\mu\text{g}/\text{mL}$ ), rifampicin (RIF, 5  $\mu\text{g}/\text{mL}$ ) and meropenem (MER, 50  $\mu\text{g}/\text{mL}$ ) as various double combinations with an inoculum of  $\sim 10^7$  CFU/mL. **(A)** ATH 8; **(B)** ATH 16; **(C)** ATH 18; **(D)** ATH 24; **(E)** BD 32; and **(F)** BD 46. The y-axis starts from the limit of detection ( $\sim 1.3 \cdot 10^2$  CFU/mL) and the dashed horizontal line represents the limit of quantification.

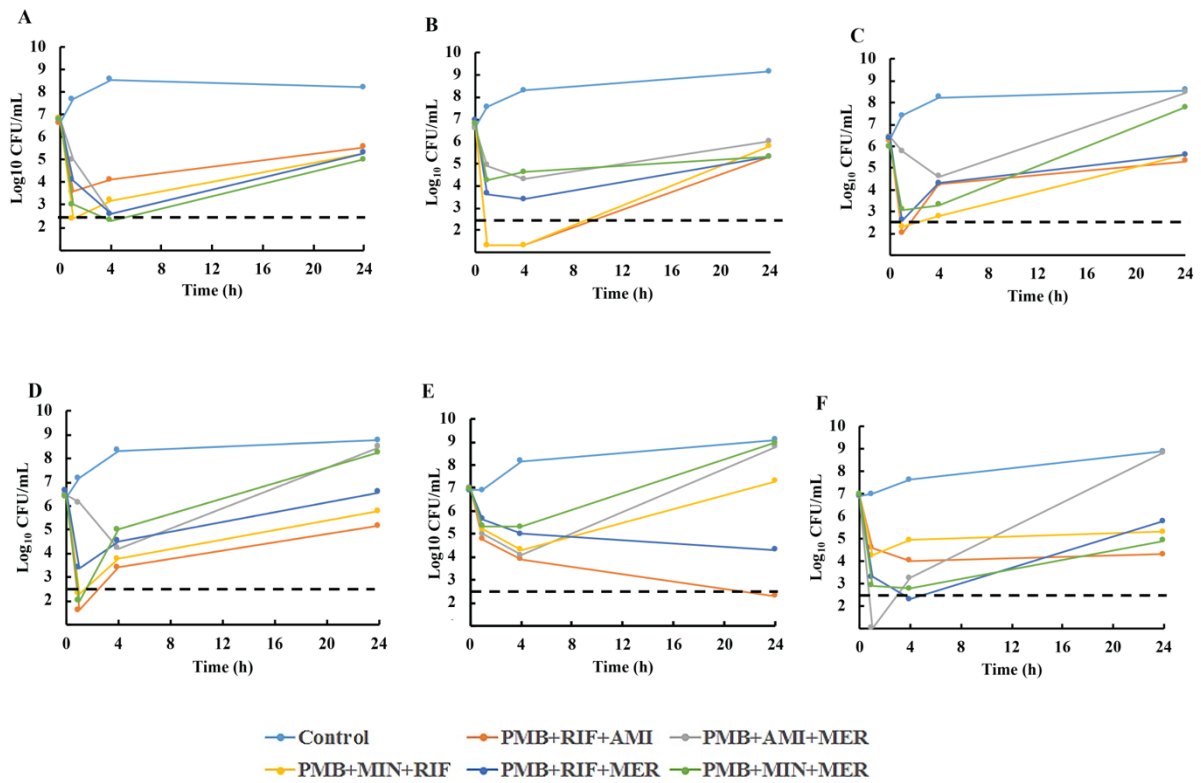

**FIG S3.** Static time-kill curves with clinically relevant concentrations of polymyxin B (PMB, 2  $\mu\text{g}/\text{mL}$ ), amikacin (AMI, 20  $\mu\text{g}/\text{mL}$ ), minocycline (MIN, 4  $\mu\text{g}/\text{mL}$ ), rifampicin (RIF, 5  $\mu\text{g}/\text{mL}$ ) and meropenem (MER, 50  $\mu\text{g}/\text{mL}$ ) as various polymyxin B-based triple combinations with an inoculum of  $\sim 10^7$  CFU/mL. (A) ATH 8; (B) ATH 16; (C) ATH 18; (D) ATH 24; (E) BD 32; and (F) BD 46. The y-axis starts from the limit of detection ( $\sim 1.3\text{-log}_{10}$  CFU/mL) and the dashed horizontal line represents the limit of quantification.
